RESEARCH ARTICLE

# Curvilinear Effects of Invasive Plants on Plant Diversity: Plant Community Invaded by *Sphagneticola trilobata*

Shan-Shan Qi<sup>1</sup>✉, Zhi-Cong Dai<sup>1</sup>✉, De-Li Zhai<sup>2,3</sup>, Si-Chong Chen<sup>4</sup>, Chun-Can Si<sup>1,5</sup>, Ping Huang<sup>1,6</sup>, Rui-Ping Wang<sup>7</sup>, Qiong-Xin Zhong<sup>7</sup>, Dao-Lin Du<sup>1,6\*</sup>

**1.** Institute of Environment and Ecology, School of the Environment and Safety Engineering, Jiangsu University, Zhenjiang, China, **2.** World Agroforestry Centre (ICRAF), Central and East Asia Office, Kunming, China, **3.** Centre for Mountain Ecosystem Studies (CMES), Kunming Institute of Botany, Chinese Academy of Sciences, Kunming, China, **4.** Evolution and Ecology Research Centre, School of Biological, Earth and Environmental Sciences, University of New South Wales, Sydney, Australia, **5.** Department of Biological and Chemical Engineering, Jingdezhen University, Jingdezhen, China, **6.** Key Laboratory of Modern Agricultural Equipment and Technology, Ministry of Education & Jiangsu Province, Jiangsu University, Zhenjiang, China, **7.** College of Life Sciences, Hainan Normal University, Haikou, China

\*ddl@ujs.edu.cn

✉ These authors contributed equally to this work.

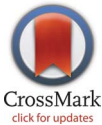

**OPEN ACCESS**

**Citation:** Qi S-S, Dai Z-C, Zhai D-L, Chen S-C, Si C-C, et al. (2014) Curvilinear Effects of Invasive Plants on Plant Diversity: Plant Community Invaded by *Sphagneticola trilobata*. PLoS ONE 9(11): e113964. doi:10.1371/journal.pone.0113964

**Editor:** Fei-Hai Yu, Beijing Forestry University, China

**Received:** July 17, 2014

**Accepted:** November 2, 2014

**Published:** November 26, 2014

**Copyright:** © 2014 Qi et al. This is an open-access article distributed under the terms of the [Creative Commons Attribution License](https://creativecommons.org/licenses/by/4.0/), which permits unrestricted use, distribution, and reproduction in any medium, provided the original author and source are credited.

**Data Availability:** The authors confirm that all data underlying the findings are fully available without restriction. All relevant data are within the paper and its Supporting Information files.

**Funding:** This study was partially supported by the National Natural Science Foundation of China (NSFC-30970556, 31170386), the Project Funded by the Priority Academic Program Development of Jiangsu Higher Education Institutions (PAPD) and Collaborative Innovation Center of Technology and Material of Water Treatment (ESK201001), the Jiangsu University Research Foundation (09JDG020, 14JDG010), the Research and Innovation Project for College Graduates of Jiangsu Province of China (CXZZ12\_0697). The funders had no role in study design, data collection and analysis, decision to publish, or preparation of the manuscript.

**Competing Interests:** The authors have declared that no competing interests exist.

## Abstract

The effects of invasive plants on the species diversity of plant communities are controversial, showing either a positive or negative linear relationship. Based on community data collected from forty 5 m × 5 m plots invaded by *Sphagneticola trilobata* in eight cities across Hainan Island, China, we found *S. trilobata* decreased plant community diversity once its cover was beyond 10%. We demonstrated that the effects of invasive/native plants on the plant diversity of communities invaded by *S. trilobata* were curvilinear. These effects, which showed peaks under different degrees of vegetation cover, appeared not only for *S. trilobata* and all invasive plants, but also for all native plants. Invasive plants primarily had negative effects on plant diversity when they became abundant at a much lower cover level (less than 35%), compared with the native plants (over 60%). Thus, it is necessary to distinguish a range for assessing the effects of plants, especially invasive plants. Our results also confirmed that the invasion intensity of invasive alien plants increased with the intensity of local economic development. We highlight and further discuss the critical importance of curvilinear effects of biological invasion to provide ideas regarding the conservation of local biodiversity and the management of invasive plants.

## Introduction

Biodiversity is important in the functional provision and stability of ecosystems [1, 2]. However, biodiversity is continuously being lost due to human disturbance [3]. For example, unprecedented land conversion plays a key role in weed invasion through destroying native plant communities and facilitating the invasion of non-indigenous plants [4–6]. Continual development, the expansion of urbanization, and the conversion of forest lands for agricultural development lead to increasing losses of native species [7, 8] and result in the establishment and spreading of alien inhabitants in these communities [5]. These non-indigenous inhabitants can change the structure and diversity of the plant community by suppressing subordinate species [9]. Thus, exotic species invasion is recognized as one of the most serious global threats to natural ecosystems [10]. Exotic invasions continue to crowd out native plant species and homogenize biota around the world [11, 12], with the consequences of decreasing global biodiversity [13] and impairing ecosystem functions [10, 14].

Increasing efforts are being made to elucidate the mechanisms underlying exotic invasion to find solutions for the restoration of invaded landscapes. However, the effects of invasive plants on species diversity in plant communities are still controversial [1, 15]. Furthermore, the scarcity of quantitative studies on the impacts of invasive plant species on plant communities limits our understanding of the impacts of invasion [16–18].

*Sphagneticola trilobata* (L.C. Rich.) Pruski (Synonym: *Wedelia trilobata* (L.) Hitchc.), a widespread notorious clonal weed that is native to tropical America, was introduced as a groundcover plant and has invaded many tropical and subtropical regions, including Hainan Island, China [19, 20]. *S. trilobata* is a fast-growing, mat-forming perennial creeping herb [21, 22]. *S. trilobata*'s dominance over grass is particularly noteworthy [19]. Once this species becomes established in new habitats, it exhibits overgrowth to form thick ground cover, crowding out and preventing the regeneration of other plant species [21]. Because of its noteworthy dominance over grass communities, *S. trilobata* has been listed as one of the 100 World's Worst Invasive Alien Species [23]. Nevertheless, no quantitative evaluations of the impact of *S. trilobata* on resident plants have been reported to date.

In the present study, we used *S. trilobata* and the associated invaded community as a model system to address the question of the possible impacts of *S. trilobata* and other invasive plants on the plant diversity of the invaded community.

## Methods

### Sample sites

Field investigations were conducted on Hainan Island, China, in May 2007 to evaluate the influence of *S. trilobata* and other invasive plants on native plants and

the diversity of local species. Sampling sites were selected along roads in eight cities/districts, which were evenly distributed on Hainan Island: Dongfang (DF), Danzhou (DZ), Haikou (HK), Qionghai (QH), Sanya (SY), Tunchang (TC), Wenchang (WC), and Wanning (WN) (Fig. 1). We randomly established five sites on public land in which *S. trilobata* appeared at each city (except for Haikou, where there were six sites, and Sanya, with four sites). Each site was separated from the others by a distance of at least 500 m. Then, one plot (5 m × 5 m) was randomly sampled from each site. In total, 40 plots, containing nine species on average, were surveyed.

All of the vascular plant species present in each plot were recorded, and the coverage of each species in the sampled plots was estimated using a subdivided quadrat method [24, 25]. The compositions of the plant communities were distinguished as native, alien non-invasive, and invasive plants. Native plants were identified according to the Chinese Virtual Herbarium (CVH, <http://www.cvh.org.cn/cms/>), and non-native plants were identified as invasive or alien non-invasive (alien for short) plants according to the Database of Invasive Alien Species in China (DIASC, <http://www.chinaias.cn/wjPart>).

### Community diversity metrics

Shannon-Wiener's species diversity index ( $H'$ ) [26], Simpson's dominance index ( $D'$ ) [27], and Shannon-Wiener's evenness index ( $J'$ ) [28] were used to test the community effects of the compositions (*S. trilobata*, all invasive plants and native plants) of the invaded communities. All of these indices were based on the cover of a given species in the sampled plots [24]. The equations for calculating the above indices are follows: (1)  $H' = -\sum[(P_i) \ln(P_i)]$ ; (2)  $D' = 1/\sum(P_i)^2$ ; and (3)  $J' = H'/(\ln S)$ .  $P_i$  is the ratio of the cover of species  $i$  to the total cover of all species in each plot, and  $S$  is the number of species in each plot [29].

### Statistical analyses

To evaluate the quantitative effects of the community compositions (*S. trilobata*, all invasive plants and all native plants) on the plant diversity index ( $H'$ ), community dominance index ( $D'$ ) and community evenness index ( $J'$ ) of the invaded communities, the cover values for *S. trilobata*, all invasive plants and native plants were classified into four grades [30]: I-0~25%, II-26~50%, III-51~75%, and IV-76~100%, corresponding to slight, moderate, excess, and severe invasion phases, respectively. All data were logistic transformed if necessary to meet assumptions of normality and homoscedasticity before analysis. We applied two-way analysis of variance (ANOVA) using a generalized linear model (GLM), with the plant cover grades (I, II, III and IV) and sampling cities as the grouping factors, and we employed Duncan's multiple-range test ( $\alpha=0.05$ ) to compare means among the four grades of cover of invasive *S. trilobata*, all invasive plants (including *S. trilobata*) and native plants among cities. A quadratic non-linear regression model was used to detect the relationships between the plant

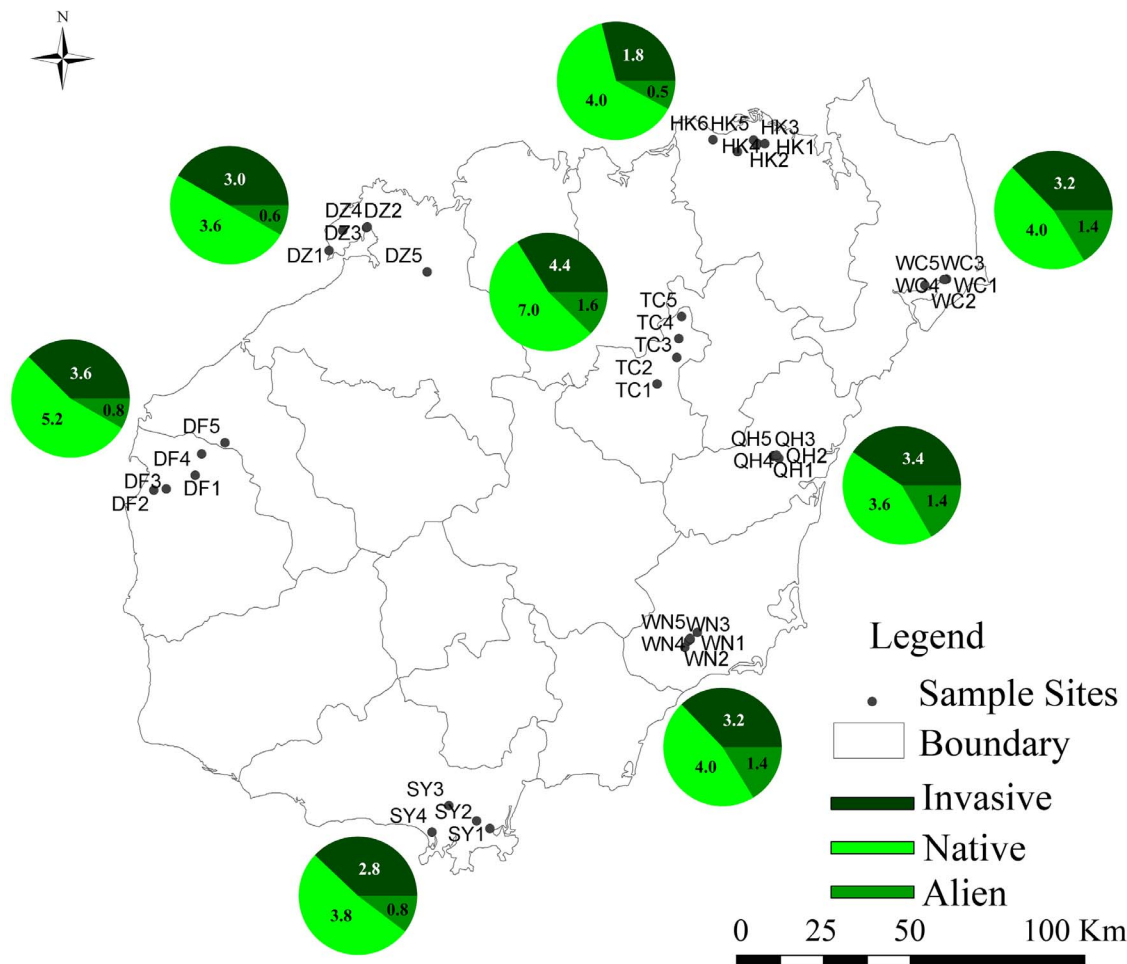

**Figure 1. Distribution of sampling cities on Hainan Island and the average species number in each district.** The pie charts show the mean number of the invasive, native, and alien non-invasive species in a 5 m × 5 m plot. Dongfang (DF), Danzhou (DZ), Haikou (HK), Qionghai (QH), Sanya (SY), Tunchang (TC), Wenchang (WC), and Wanning (WN).

doi:10.1371/journal.pone.0113964.g001

diversity of the community and the cover of *S. trilobata*, all invasive plants and all native plants.

To test the impacts of human disturbance on the distribution of *S. trilobata*, all invasive plants and native plants, data on geographical locations (including longitude, latitude and altitude) and the economy (including farming, forestry, grazing output and total economic output) were analyzed via Pearson correlation analysis. The total economic output included farming, forestry and grazing in each sampled city in 2006 [31], which would significantly change the local vegetation. Then, to visualize the plant cover distribution pattern, as affected by geography and the economy, we constructed Free Energy Landscape graphs using the data on the average plant cover (*S. trilobata*, all invasive plants and native plants), geographical location, and total economic output across the eight sampled cities.

All data were analyzed using SAS statistical software (v9.1) [32] and visualized using SigmaPlot Version 11.

## Results

### Relationships between invasive and native plants

The quadratic non-linear regression analysis indicated that the cover of invasive *S. trilobata* ( $r^2=0.72$ ,  $p<0.0001$ ) and all invasive plants ( $r^2=0.73$ ,  $p<0.0001$ ) both showed a significant negative correlation with the cover of native plants (Fig. 2).

### Effects of the species composition on plant diversity

The maximum number of species appeared at Wenchang (WC) and Wanning (WN), while the minimum number of species was recorded at Haikou (HK) (Fig. 1). Finally, a total of 65 plant species (including *S. trilobata* and twelve other invasive species, ten alien species, and 42 native species; Table S1) were identified in the sampled plots. The cover values obtained for *S. trilobata*, the other invasive plants, the alien non-invasive plants, and the native plants ranged from 0.5% to 99%, 0% to 31.5%, 0% to 31%, and 1% to 85.5%, respectively.

The changes in plant community diversity in response to the species composition (*S. trilobata*, all invasive plants and all native plants) were similar, exhibiting a quadratic pattern, but did not present a simple linear relationship (Fig. 3a-c; Table 1). The cover of both all invasive plants and all native plants was a relatively stable predictor of peak plant diversity (species diversity,  $H'$ ; species dominance,  $D'$ ; and species evenness,  $J'$ ) in the community invaded by *S. trilobata* (approx. 35% for invasive plants and 50% for native plants; Table 1). For *S. trilobata*, the peak plant diversity appeared when the cover was less than 10% (Table 1).

The values of diversity indices were altered by both the sampling cities and the grade of coverage within the community composition (*S. trilobata*, all invasive plants and all native plants) (Table 2). Accordingly, higher grades of coverage of both *S. trilobata* and all invasive plants decreased species diversity ( $H'$ ), species dominance ( $D'$ ), and species evenness ( $J'$ ) in the communities (Fig. 4a-4c). The highest plant diversity appeared under the lowest cover (Grade I) of *S. trilobata* and all invasive plants. However, the lowest and the highest plant diversity appeared under the lowest cover (Grade I) and Grade II cover of native plants, respectively (Fig. 4a-4c).

### Influence of heterogeneous spatial distribution on species diversity

There were significant regional differences between the species diversity among these eight cities (Table 2). Dongfang (DF), located on west Hainan Island, presented the highest plant species diversity, whereas DZ, HK, QH and SY showed relatively low plant diversity (Fig. 5).

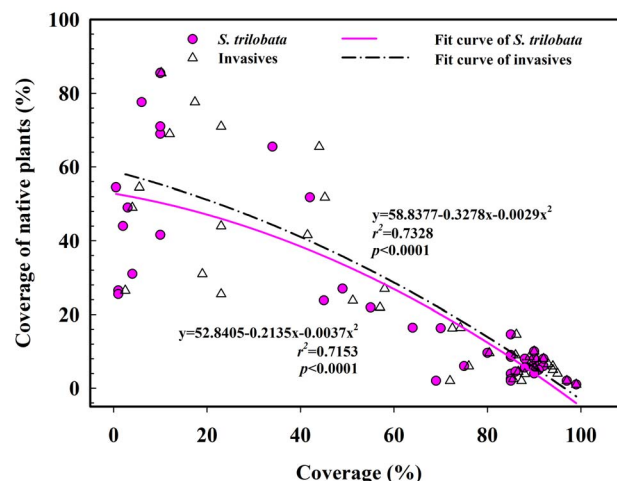

**Figure 2. Relationships between the coverage of native plants and both the coverage of *S. trilobata* and all invasive plants.**

doi:10.1371/journal.pone.0113964.g002

### Influence of the spatial distribution and local economy on the species composition of plant communities

The cover of *S. trilobata* and all invasive plants significantly increased along the examined range of longitudes (Table 3; Fig. 6a, 6d), and the cover of all invasive plants significantly decreased along the altitudinal gradient (Table 3; Fig. 6f).

A significant positive relationship was found between the economy and the cover of both *S. trilobata* and all invasive species ( $r=0.34$ ,  $p=0.034$ ;  $r=0.35$ ,  $p=0.025$ ; Table 3). A greater increase in the rate of total economic output in a district corresponded to a higher cover of *S. trilobata* and all invasive species (Fig. 6a-6f) and a lower cover of native species (Fig. 6 g-6i).

## Discussion

### Effects of plants cover on biodiversity

In contrast to previous studies [26, 33], we observed a curvilinear relationship between the cover of invasive/native plants and plant community biodiversity. Many studies have found that invasive plants display a negative linear relationship with species diversity [7, 11–13], while others have detected a positive linear relationship [34, 35]. Biodiversity affects ecosystem function and changes along environmental stress gradients [36], which might be due to different underlying factors (e.g., soil fertility), or the presence of scale-dependent effects on diversity due to altering species-area relationships in the invasion of non-native species [1, 37], or the sensitivity of different compositions in communities [17, 33]. The species composition of communities could have far-reaching effects on ecosystem processes [11].

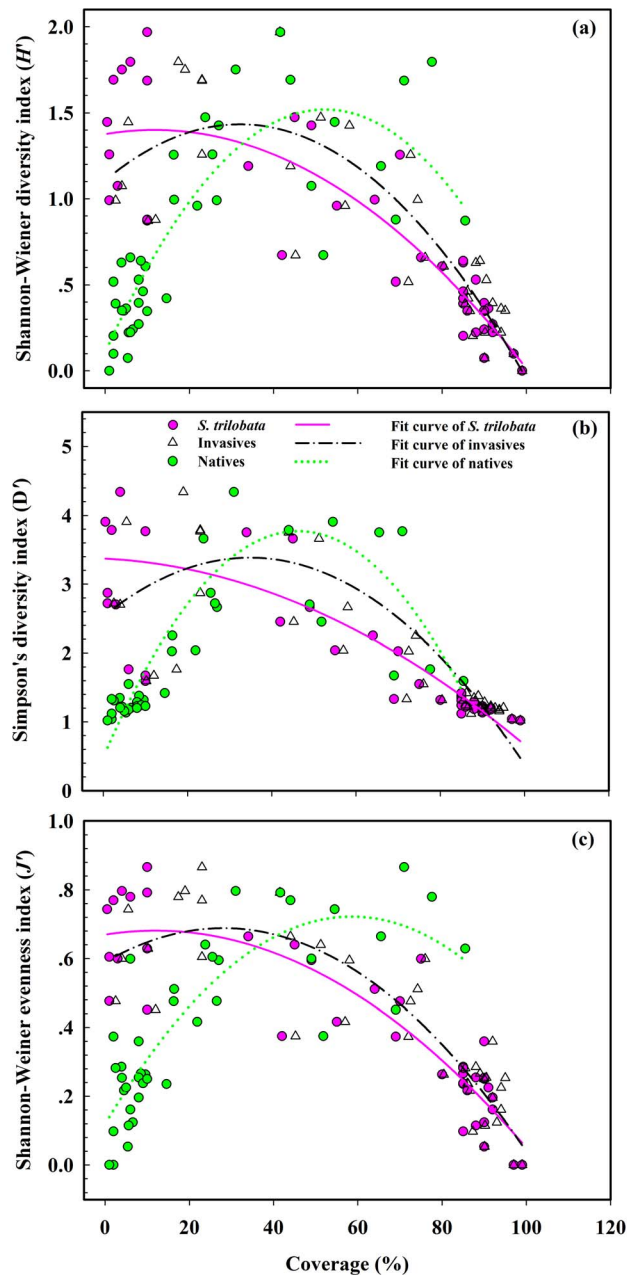

**Figure 3. Relationships between community biodiversity indices and coverage within the community composition (*S. trilobata*, all invasive plants, and all native plants).** (a): Shannon-Wiener's species diversity index,  $H' = -\sum[(P_i) \ln(P_i)]$ ; (b): Simpson's dominance index,  $D' = 1/\sum(P_i)^2$ ; (c): Shannon-Wiener's evenness index,  $J' = H'/(\ln S)$ .

doi:10.1371/journal.pone.0113964.g003

Native species are often considered to be the driving force in increasing biodiversity at local scales [38]. In the present study, the native plants in the communities invaded by *S. trilobata* also contributed to increasing plant diversity

**Table 1.** Relationships between coverage within the community composition and community biodiversity indices.

| Index                                             | Compositions        | Quadratic regression equation                    | $x_{y_{max}}(\%)$ | $y_{max}$ | $r^2$ | $F$   | $p$     |
|---------------------------------------------------|---------------------|--------------------------------------------------|-------------------|-----------|-------|-------|---------|
| Shannon-Wiener's Species Diversity Index ( $H'$ ) | <i>S. trilobata</i> | $y = 1.3762 + 0.0042x - 0.0002x^2$               | 10.5              | 1.4       | 0.77  | 62.94 | <0.0001 |
|                                                   | Invasives           | $y = 1.1069 + 0.0204x - 0.0003x^2$               | 34.0              | 1.5       | 0.77  | 62.74 | <0.0001 |
|                                                   | Natives             | $y = 0.106 + 0.0541x - 0.0005x^2$                | 54.1              | 1.6       | 0.71  | 44.42 | <0.0001 |
| Simpson's Dominance Index ( $D'$ )                | <i>S. trilobata</i> | $y = 0.6695 + 0.002x - 8.1546 \times 10^{-5}x^2$ | 0.0001            | 0.7       | 0.81  | 78.67 | <0.0001 |
|                                                   | Invasives           | $y = 0.5898 + 0.007x - 0.0001x^2$                | 35.0              | 0.7       | 0.80  | 74.38 | <0.0001 |
|                                                   | Natives             | $y = 0.1188 + 0.0206x - 0.0002x^2$               | 51.5              | 0.6       | 0.70  | 42.37 | <0.0001 |
| Shannon-Wiener's Evenness Index ( $J'$ )          | <i>S. trilobata</i> | $y = 3.3722 - 0.0029x - 0.0002x^2$               | -7.3              | 3.4       | 0.54  | 21.64 | <0.0001 |
|                                                   | Invasives           | $y = 2.5329 - 0.049x - 0.0007x^2$                | 35.0              | 3.4       | 0.53  | 21.05 | <0.0001 |
|                                                   | Natives             | $y = 0.4863 + 0.1419x - 0.0015x^2$               | 47.3              | 3.8       | 0.62  | 30.44 | <0.0001 |

Note: (1)  $H' = -\sum[(P_i) \ln(P_i)]$ ;  $D' = 1/\sum(P_i)^2$ ;  $J' = H'/(\ln S)$ .  $P_i$  is the ratio of the cover of species  $i$  to the total coverage of all species in each plot;  $S$  is the number of species in each plot.

(2) Invasives – all invasive plants, Natives - native plants.

doi:10.1371/journal.pone.0113964.t001

when their cover was below 55%. Once their cover exceeded 55%, a negative effect of native plants on local species diversity appeared, possibly due to disequilibrium of communities caused by the rapid growth of some native plants in the sampled plots resulting in homogenization. For example, the percentages of *Eriachne*

**Table 2.** Two-way ANOVA for community biodiversity indices (species diversity, dominance, and evenness) among cities, as affected by the cities and four grades of cover within the community composition (*S. trilobata*, all invasive plants and all native plants).

| Source of variation        | DF | Species diversity index ( $H'$ ) |      |       |         | Community dominance index ( $D'$ ) |         |       |         | Community evenness index ( $J'$ ) |      |       |         |
|----------------------------|----|----------------------------------|------|-------|---------|------------------------------------|---------|-------|---------|-----------------------------------|------|-------|---------|
|                            |    | SS                               | MS   | $F$   | $p$     | SS                                 | MS      | $F$   | $p$     | SS                                | MS   | $F$   | $p$     |
| City                       | 7  | 1.55                             | 0.22 | 4.07  | 0.0069  | 13.40                              | 1.91    | 17.7  | <0.0001 | 0.21                              | 0.03 | 4.75  | 0.0032  |
| <i>S. trilobata</i>        | 3  | 5.49                             | 1.83 | 33.52 | <0.0001 | 26.19                              | 8.73    | 80.72 | <0.0001 | 0.39                              | 0.13 | 20.4  | <0.0001 |
| City × <i>S. trilobata</i> | 10 | 0.78                             | 0.08 | 1.42  | 0.2440  | 17.17                              | 1.72    | 15.88 | <0.0001 | 0.08                              | 0.01 | 1.21  | 0.3472  |
| Error                      | 19 | 1.04                             | 0.05 |       |         | 2.05                               | 0.11    |       |         | 0.12                              | 0.01 |       |         |
| Total                      | 39 | 11.79                            |      |       |         | 66.70                              |         |       |         | 1.23                              |      |       |         |
| City                       | 7  | 1.76                             | 0.25 | 4.11  | 0.0050  | 16.90                              | 2.41    | 15.48 | <0.0001 | 0.24                              | 0.03 | 3.69  | 0.0087  |
| All invasives              | 3  | 5.02                             | 1.67 | 27.28 | <0.0001 | 31.19                              | 10.40   | 66.68 | <0.0001 | 0.33                              | 0.11 | 12.04 | <0.0001 |
| City × All invasives       | 7  | 0.96                             | 0.14 | 2.24  | 0.0698  | 11.06                              | 1.58    | 10.14 | <0.0001 | 0.05                              | 0.01 | 0.83  | 0.5767  |
| Error                      | 22 | 1.35                             | 0.06 |       |         | 3.43                               | 0.16    |       |         | 0.20                              | 0.01 |       |         |
| Total                      | 39 | 11.79                            |      |       |         | 66.70                              |         |       |         | 1.23                              |      |       |         |
| City                       | 7  | 2.28                             | 0.33 | 4.2   | 0.0045  | 2812.00                            | 401.72  | 2.56  | 0.0430  | 0.15                              | 0.02 | 1.69  | 0.1627  |
| All natives                | 3  | 4.66                             | 1.55 | 20.03 | <0.0001 | 9940.80                            | 3313.60 | 21.15 | <0.0001 | 0.30                              | 0.10 | 7.94  | 0.0009  |
| City × All natives         | 7  | 1.08                             | 0.15 | 1.98  | 0.1037  | 926.48                             | 132.35  | 0.84  | 0.5629  | 0.02                              | 0.00 | 0.28  | 0.9555  |
| Error                      | 22 | 1.71                             | 0.08 |       |         | 6.11                               | 0.28    |       |         | 0.27                              | 0.01 |       |         |
| Total                      | 39 | 11.79                            |      |       |         | 66.70                              |         |       |         | 1.23                              |      |       |         |

doi:10.1371/journal.pone.0113964.t002



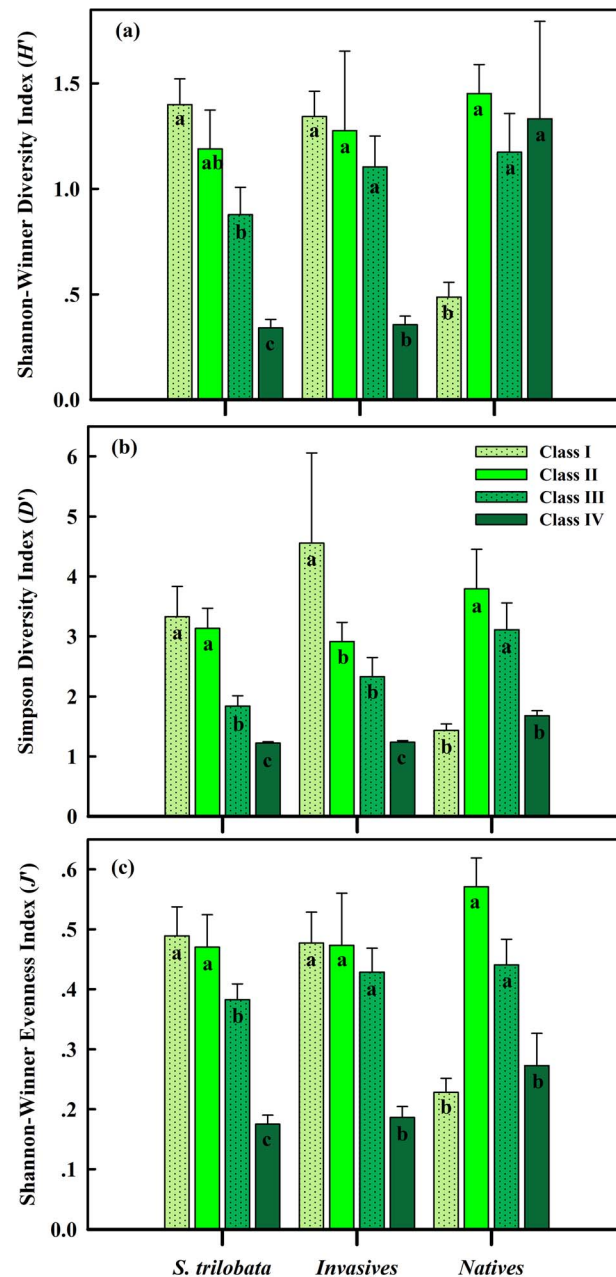

**Figure 4. Mean biodiversity of the plant communities among four classes of cover (I, II, III, IV) within the community composition (*S. trilobata*, all invasive plants, and all native plants).** (a): Shannon-Wiener's species diversity index ( $H'$ ); (b): Simpson's dominance index ( $D'$ ); (c): Shannon-Wiener's evenness index ( $J'$ ). For each variable, means labeled with the same letter are not significantly different according to Duncan's multiple-range test at the  $p=0.05$  level.

doi:10.1371/journal.pone.0113964.g004

*pallescentis* cover in plot TC4, *Chrysopogon aciculatus* cover in plot SY4, and *Dendrolobium triangulare* cover in plot SY1 were 87.7%, 92.8%, and 92.8%, respectively.

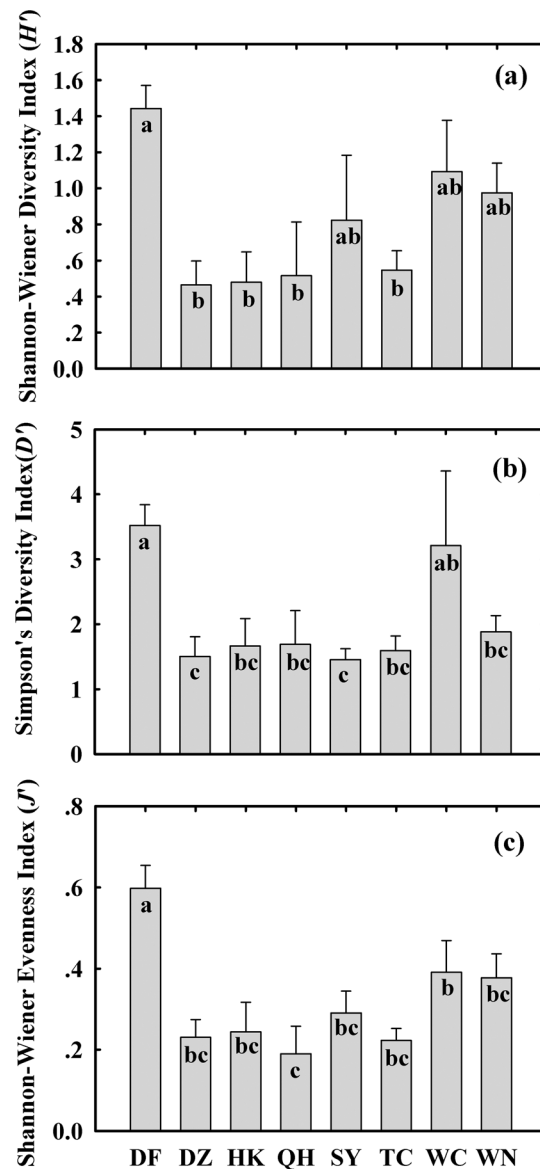

**Figure 5. Mean biodiversity of the plant communities among eight cities across Hainan.** (a): Shannon-Wiener's species diversity index ( $H'$ ); (b): Simpson's dominance index ( $D'$ ); (c): Shannon-Wiener's evenness index ( $J'$ ). For each variable, means labeled with the same letter are not significantly different according to Duncan's multiple-range test at the  $p=0.05$  level.

doi:10.1371/journal.pone.0113964.g005

We also found that the examined biodiversity indices (species diversity, species dominance, and species evenness) did not linearly decrease/increase with increases of *S. trilobata* or all invasive plants. Instead, *S. trilobata* or all invasive plants slightly increased the plant diversity of the invaded community within a certain range of cover values (slight invasion phase), possibly due to direct or indirect facilitation of non-native species during their initial introduction [39]. For example, invasive *Sargassum muticum* increased native species richness at a low

**Table 3.** Pearson's correlation between soil properties, environmental locations, local economic output and the coverage of *S. trilobata*, invasive plants and native plants.

| Factors  |              | <i>S. trilobata</i> |               | Invasives |               | Natives  |          |
|----------|--------------|---------------------|---------------|-----------|---------------|----------|----------|
|          |              | <i>r</i>            | <i>p</i>      | <i>r</i>  | <i>p</i>      | <i>r</i> | <i>p</i> |
| Location | Longitude    | 0.4212              | <b>0.0068</b> | 0.4400    | <b>0.0045</b> | -0.1967  | 0.2238   |
|          | Latitude     | 0.2332              | 0.1476        | 0.2455    | 0.1268        | -0.2122  | 0.1887   |
|          | Altitude     | -0.3105             | 0.0512        | -0.3180   | <b>0.0459</b> | 0.2269   | 0.1591   |
|          | Slope        | -0.1389             | 0.3927        | -0.0902   | 0.5800        | -0.0049  | 0.9759   |
|          | Hillside     | 0.1784              | 0.2707        | 0.1495    | 0.3572        | -0.0940  | 0.5642   |
| Economy  | Farming      | 0.1851              | 0.2529        | 0.1954    | 0.2269        | -0.1953  | 0.2273   |
|          | Forestry     | 0.3621              | <b>0.0217</b> | 0.3877    | <b>0.0134</b> | -0.2884  | 0.0711   |
|          | Grazing      | 0.3812              | <b>0.0152</b> | 0.3983    | <b>0.0109</b> | -0.2962  | 0.0635   |
|          | Total output | 0.3353              | <b>0.0344</b> | 0.3533    | <b>0.0253</b> | -0.2875  | 0.0721   |

Bold type indicates significant differences at the 0.05 probability level.

doi:10.1371/journal.pone.0113964.t003

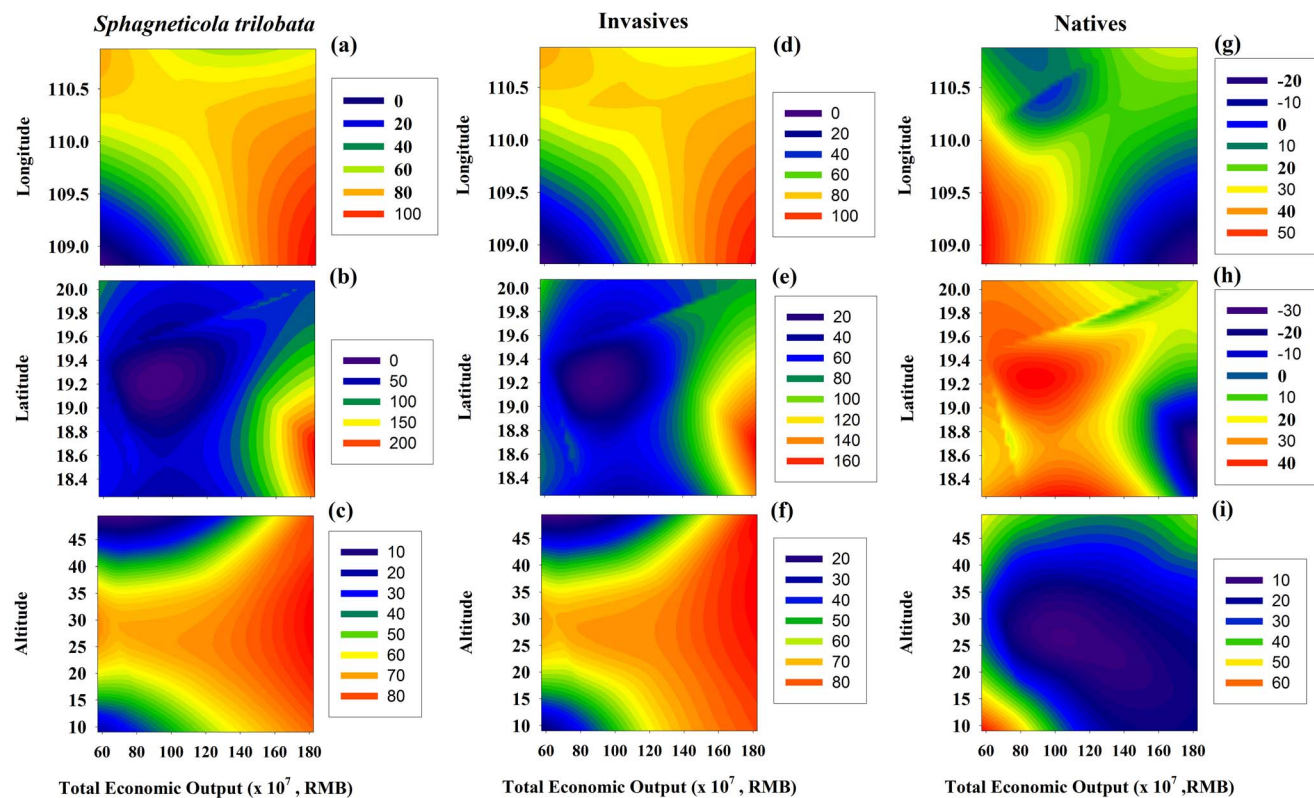

**Figure 6.** Geographical distribution patterns of the coverage of *S. trilobata* (a, b, c), all invasive plants (d, e, f), and native plants (g, h, i) across different geographical locations (Longitude, Latitude, Altitude) and total economic outputs. The total economic output value included farming, forestry, and animal husbandry in each sampled cities in 2006.

doi:10.1371/journal.pone.0113964.g006

percent cover (20%) [33]. This finding is consistent with a study by Melo *et al.* [6] indicating that human disturbance at an intensity below a certain threshold would not trigger irreversible biodiversity loss, and the delivery of ecosystem services would increase up to a point with increasing human disturbance.

However, *S. trilobata* seriously inhibits the growth of most species in an invaded community due to its rapid growth, vegetative reproduction [19, 22] and inhibition of the regeneration of other species [16] via allelochemicals [40]. These effects might also benefit from the clonal integration of *S. trilobata* [19], which can increase the initial spreading of clonal plants into new habitats and thereby alter community structure [41]. Once *S. trilobata* occurs at a low percent cover, its invasion will significantly decrease the plant diversity of invaded communities. *S. trilobata* will cover extensive areas, including roadsides, agricultural and pasture lands, open lots, waste disposal sites, garbage dumps, and other disturbed areas [19, 21]. A similar decreasing community-level species pattern was observed for all invasive plants in the communities invaded by *S. trilobata* within a relatively stable range of percent covers (>35%), in contrast to previous research reporting positive or negative linear effects of invasive plants on biodiversity [26, 33, 39]. These findings suggest that the effects of plant invasion on local biodiversity might show a time lag.

Such time lag effects might be due to the requirement for pre-adaptation to new habitats or could be purely demographic phenomena (e.g., Allee effects) [42]. It is widely recognized that some species present a time lag in their responses to broad-scale land use and land cover changes [4]. There is often a lag phase after non-native species establish small populations before their populations spread [42] because it is necessary for established populations of non-native species to adapt to new habitats (e.g., limiting resources, climates, native competitors, new enemies) and to accumulate a significant population size before the population outbreak [43].

### Effects of human disturbance on the plant distribution

*S. trilobata* is generally used as an ornamental garden species in Hawaii and on other Pacific islands [23] and is universally employed as a greenbelt plant in South China, accompanying anthropogenic transposition of indigenous plants. As a clonal plant, *S. trilobata* rapidly spreads and becomes established in fields once it escapes from gardens [20] because of its noteworthy vegetative dominance over plant communities [19].

Metzger *et al.* [4] found that the landscape history strongly affects the present distribution pattern of species in fragmented landscapes. In addition, Qian *et al.* [12] observed that humans contribute more to the number of exotic species compared with ecological conditions. However, Hainan Island has been subjected to rapid land conversion and loss of the natural forest habitat in the past decades [44, 45], resulting in a decrease in natural forest habitat and increases in farmlands and tourism. Developed regions in Hainan are mostly concentrated in the east and at low altitudes, where human activities are more frequent. Our results also

showed that the cover of *S. trilobata* and all invasive plants in the community presented a clear increasing geographical pattern from west to east in Hainan (Table 2-3), consistent with the economic distribution pattern (Table 3; Fig. 6a, 6d, 6g). Invasion increases with the intensity of historical land use [25] and economic activities on a global scale [46]. Nevertheless, the abundance of native species might be impacted by habitat loss and the introduction of exotic species [38]. Consequently, local development could promote *S. trilobata* invasion in Hainan via extensively and artificially transforming native species into introduced plants.

Our findings will not only provide managers with urgently required information about the effects of the invasive weed *S. trilobata*, but will also contribute to our broader understanding of the effects of invasive plants on communities.

### Implications of the curvilinear effects of plant invasion

Plant invasion is often positively linked to the intensity of historical land use, which might promote invasion far into the future [25, 47]. Higher levels of community biodiversity increase tolerance to changing environmental conditions and are more beneficial for maintaining ecosystem functions [1, 36]. However, rapid economic development has promoted the expansion of invasive species on a global scale [30]. Global biodiversity, especially for species-rich regions and island ecosystems [8], such as tropical Hainan Island, is suffering unprecedented threats because of large-scale and continuing strengthened economic development and other human activities. As a result of human disturbance, biological invasion has negative impacts on local biodiversity due to altering community structure and/or function dramatically [48]. However, there is a time lag in the ecological consequences of habitat modifications that strongly affect the present distribution patterns of species [4].

Due to the existence of curvilinear effects, introduced non-native species do not present a threat to the local ecological environment in the initial stage. Therefore, insufficient attention is usually paid to these non-native species by concerned governments until the situation is out of control. Thus, prior to the large-scale introduction of exotic horticultural or economic plants, it is necessary to conduct an adequate risk assessment for these introduced plants. Moreover, for introduced exotic species, we recommend that human disturbances should be decreased in local ecosystems, and the eradication of invasive species should be increased to reduce the success of invasion before biodiversity declines.

However, the ecological and the phenological responses of invasive plants to the indicated time-lag effects remain unknown, and further work should be conducted to elucidate the underlying mechanisms of plant invasion. For example, wider ranging surveys involving larger sample numbers should be performed to assess plant invasion, long-term species diversity and the function of community dynamics in permanent plots and for functional comparisons of diversity in invaded communities.

## Supporting Information

**Table S1.** List of plant species in the investigated plots.

[doi:10.1371/journal.pone.0113964.s001](https://doi.org/10.1371/journal.pone.0113964.s001) (DOC)

## Author Contributions

Conceived and designed the experiments: ZCD DLD. Performed the experiments: SSQ ZCD CCS QXZ. Analyzed the data: SSQ ZCD DLZ SCC. Contributed reagents/materials/analysis tools: RPW. Wrote the paper: SSQ ZCD DLZ SCC PH. Species identification: QXZ.

## References

1. Chapin FS, Zavaleta ES, Eviner VT, Naylor RL, Vitousek PM, et al. (2000) Consequences of changing biodiversity. *Nature* 405: 234–242.
2. Levine JM (2000) Species diversity and biological invasions: Relating local process to community pattern. *Science* 288: 852–854.
3. Knapp S, Dinsmore L, Fissore C, Hobbie SE, Jakobsdottir I, et al. (2012) Phylogenetic and functional characteristics of household yard floras and their changes along an urbanization gradient. *Ecology* 93: S83–S98.
4. Metzger JP, Martensen AC, Dixo M, Bernacci LC, Ribeiro MC, et al. (2009) Time-lag in biological responses to landscape changes in a highly dynamic Atlantic forest region. *Biological Conservation* 142: 1166–1177.
5. Goodall J, Witkowski E, McConnachie A, Keen C (2012) Altered growth, population structure and realised niche of the weed *Campuloclinium macrocephalum* (Asteraceae) after exposure to the naturalised rust *Puccinia eupatorii* (Pucciniaceae). *Biological Invasions* 14: 1947–1962.
6. Melo FPL, Arroyo-Rodríguez V, Fahrig L, Martínez-Ramos M, Tabarelli M (2013) On the hope for biodiversity-friendly tropical landscapes. *Trends in Ecology & Evolution* 28: 462–468.
7. McKinney ML (2006) Urbanization as a major cause of biotic homogenization. *Biological Conservation* 127: 247–260.
8. Reaser JK, Meyerson LA, Cronk Q, De Poorter M, Eldrege LG, et al. (2007) Ecological and socioeconomic impacts of invasive alien species in island ecosystems. *Environmental Conservation* 34: 98–111.
9. Schöb C, Butterfield BJ, Pugnaire FI (2012) Foundation species influence trait-based community assembly. *New Phytologist* 196: 824–834.
10. Pyšek P, Richardson DM (2010) Invasive species, environmental change and management, and health. *Annual Review of Environment and Resources* 35: 25–55.
11. Ehrenfeld JG, Scott N (2001) Invasive species and the soil: Effects on organisms and ecosystem processes. *Ecological Applications* 11: 1259–1260.
12. Qian H, Ricklefs RE (2006) The role of exotic species in homogenizing the North American flora. *Ecology Letters* 9: 1293–1298.
13. Olden JD, LeRoy Poff N, Douglas MR, Douglas ME, Fausch KD (2004) Ecological and evolutionary consequences of biotic homogenization. *Trends in Ecology & Evolution* 19: 18–24.
14. Zavaleta ES, Hobbs RJ, Mooney HA (2001) Viewing invasive species removal in a whole-ecosystem context. *Trends in Ecology & Evolution* 16: 454–459.
15. Davis MA, Chew MK, Hobbs RJ, Lugo AE, Ewel JJ, et al. (2011) Don't judge species on their origins. *Nature* 474: 153–154.

16. Reid AM, Morin L, Downey PO, French K, Virtue JG (2009) Does invasive plant management aid the restoration of natural ecosystems? *Biological Conservation* 142: 2342–2349.
17. Cushman JH, Gaffney KA (2010) Community-level consequences of invasion: impacts of exotic clonal plants on riparian vegetation. *Biological Invasions* 12: 2765–2776.
18. Pretto F, Celesti-Grapow L, Carli E, Blasi C (2010) Influence of past land use and current human disturbance on non-native plant species on small Italian islands. *Plant Ecology* 210: 225–239.
19. Qi S-S, Dai Z-C, Miao S-L, Zhai D-L, Si C-C, et al. (2014) Light limitation and litter of an invasive clonal plant, *Wedelia trilobata*, inhibit its seedling recruitment. *Annals of Botany* 114: 425–433.
20. Si C-C, Dai Z-C, Lin Y, Qi S-S, Huang P, et al. (2014) Local adaptation and phenotypic plasticity both occurred in *Wedelia trilobata* invasion across a tropical island. *Biological Invasions* 16: 2323–2337.
21. Song L-Y, Li C-H, Peng S-L (2010) Elevated CO<sub>2</sub> increases energy-use efficiency of invasive *Wedelia trilobata* over its indigenous congener. *Biological Invasions* 12: 1221–1230.
22. Yu H, Liu J, He W-M, Miao S-L, Dong M (2010) *Cuscuta australis* restrains three exotic invasive plants and benefits native species. *Biological Invasions* 13: 747–756.
23. IUCN (2010) *Sphagneticola trilobata*. In: IUCN/SSC Invasive Species Specialist Group (ISSG), editor. 100 of the World's Worst Invasive Alien Species.
24. Kolb A, Alpert P, Enters D, Holzapfel C (2002) Patterns of invasion within a grassland community. *Journal of Ecology* 90: 871–881.
25. Karalius T, Alpert P (2010) High abundance of introduced plants on ancient Native American middens. *Biological Invasions* 12: 1125–1132.
26. McArt S, Cook-Patton S, Thaler J (2012) Relationships between arthropod richness, evenness, and diversity are altered by complementarity among plant genotypes. *Oecologia* 168: 1013–1021.
27. Péru N, Dolédec S (2010) From compositional to functional biodiversity metrics in bioassessment: A case study using stream macroinvertebrate communities. *Ecological Indicators* 10: 1025–1036.
28. González-Sansón G, Aguilar C (2010) Reef fish diversity components as indicators of cumulative effects in a highly impacted fringe reef. *Ecological Indicators* 10: 766–772.
29. Li P-X, Krüsi B, Li S-L, Cai X-H, Yu F-H (2011) Facilitation associated with three contrasting shrub species in heavily grazed pastures on the eastern Tibetan Plateau. *Community Ecology* 12: 1–8.
30. Sinkins P, Otfinowski R (2012) Invasion or retreat? The fate of exotic invaders on the northern prairies, 40 years after cattle grazing. *Plant Ecology* 213: 1251–1262.
31. Statistical Bureau of Hainan Province and Survey Office of National Bureau of Statistics in Hainan (2007) Hainan Statistical Year book 2006: Gross output value of farming, forestry, grazing and fishery of city and county. Beijing: China Statistics Press.
32. SAS Institute Inc (2004) SAS/STAT User's Guide. Version 9.1. SAS Institute Inc Cary, North Carolina, USA.
33. White LF, Shurin JB (2011) Density dependent effects of an exotic marine macroalga on native community diversity. *Journal of Experimental Marine Biology and Ecology* 405: 111–119.
34. Sax DF, Gaines SD (2008) Species invasions and extinction: The future of native biodiversity on islands. *Proceedings of the National Academy of Sciences* 105: 11490–11497.
35. Schlaepfer MA, Sax DF, Olden JD (2011) The Potential Conservation Value of Non-Native Species. *Conservation Biology* 25: 428–437.
36. Steudel B, Hector A, Friedl T, Löffke C, Lorenz M, et al. (2012) Biodiversity effects on ecosystem functioning change along environmental stress gradients. *Ecology Letters* 15: 1397–1405.
37. Powell KI, Chase JM, Knight TM (2013) Invasive plants have scale-dependent effects on diversity by altering species-area relationships. *Science* 339: 316–318.
38. Sax DF, Gaines SD (2003) Species diversity: from global decreases to local increases. *Trends in Ecology & Evolution* 18: 561–566.
39. Rodriguez LF (2006) Can invasive species facilitate native species? Evidence of how, when, and why these impacts occur. *Biological Invasions* 8: 927–939.

40. **Zeng RS, Xie LJ, Bi HH, Song YY, Wang RL, et al.** (2010) Allelochemical mediated invasion of exotic plants in China. *Allelopathy Journal* 25: 31–50.
41. **Yu F-H, Wang N, Alpert P, He W-M, Dong M** (2009) Physiological integration in an introduced, invasive plant increases its spread into experimental communities and modifies their structure. *American Journal of Botany* 96: 1983–1989.
42. **Facon B, Genton BJ, Shykoff J, Jarne P, Estoup A, et al.** (2006) A general eco-evolutionary framework for understanding bioinvasions. *Trends in ecology & evolution* 21: 130–135.
43. **Theoharides KA, Dukes JS** (2007) Plant invasion across space and time: factors affecting nonindigenous species success during four stages of invasion. *New Phytologist* 176: 256–273.
44. **Zhai D-L, Cannon CH, Slik JWF, Zhang C-P, Dai Z-C** (2012) Rubber and pulp plantations represent a double threat to Hainan's natural tropical forests. *Journal of Environmental Management* 96: 64–73.
45. **Zhai D-L, Xu J-C, Dai Z-C, Cannon C, Grumbine RE** (2013) Increasing tree cover while losing diverse natural forests in tropical Hainan, China. *Regional Environmental Change* 9: 1–11.
46. **Bai F, Chisholm R, Sang W, Dong M** (2013) Spatial risk assessment of alien invasive plants in China. *Environmental Science & Technology* 47: 7624–7632.
47. **Simpson M, Prots B** (2013) Predicting the distribution of invasive plants in the Ukrainian Carpathians under climatic change and intensification of anthropogenic disturbances: implications for biodiversity conservation. *Environmental Conservation* 40: 167–181.
48. **Mack RN, Simberloff D, Lonsdale WM, Evans H, Clout M, et al.** (2000) Biotic invasions: Causes, epidemiology, global consequences, and control. *Ecological Applications* 10: 689–710.
